# Supplementary material for: Common Polymorphisms in the Glycoproteins of Human Cytomegalovirus and Associated Strain-Specific Immunity
Source: MDPI journal article supplement (doi:10.3390/v13061106), 2021-06-09
Supplement: s1 [file s1]

|     |       |     |                                                                                                                                                                                                                                                                                                                                                                                                                             |     |
|-----|-------|-----|-----------------------------------------------------------------------------------------------------------------------------------------------------------------------------------------------------------------------------------------------------------------------------------------------------------------------------------------------------------------------------------------------------------------------------|-----|
| (a) | gB-1  | 1   | MESRIWCLVVCVNLICIVCLGAAVSSSST- <b>RGTS</b> -ATHSH <b>SSHTT</b> SA <b>HS</b> RSGSV <b>SQRVTSSQTVSHGVNETI</b> YNTTLKYGDVVGVTNTKYPYRVCSMAQ                                                                                                                                                                                                                                                                                     | 98  |
|     | gB-2  | 1   | MESRIWCLVVCVNLICIVCLGAAVSSSST <b>SHATS</b> STHNGSH <b>TSRTT</b> SA-QTRSV-Y <b>SQHV</b> TSS <b>EAVSHRANETI</b> YNTTLKYGDVVGVTNTKYPYRVCSMAQ                                                                                                                                                                                                                                                                                   | 98  |
|     | gB-3  | 1   | MESRIWCLVVCVNLICIVCLGAAVSSSST <b>SHATS</b> STHNGSH <b>ASRTT</b> SA-QTRSV- <b>SSQHV</b> TSS <b>KAVSHRANETI</b> YNTTLKYGDVVGVTNTKYPYRVCSMAQ                                                                                                                                                                                                                                                                                   | 98  |
|     | gB-4  | 1   | MESRIWCLVVCVNLICIVCLGAAVSSS <b>TS</b> - <b>RATS</b> -THNGH <b>TSHTT</b> SA-QTR <b>SI</b> - <b>SSQRV</b> TSS <b>EAVSHRANETI</b> YNTTLKYGDVVGVTNTKYPYRVCSMAQ                                                                                                                                                                                                                                                                  | 96  |
|     | gB-5  | 1   | MESRIWCLVVCVNLICIVCLGAAVSSS <b>ST</b> <b>TGSRG</b> <b>TS</b> IHNH <b>SSHTT</b> SA <b>ARSQ</b> SGSV <b>SHHV</b> TSSQ <b>TVSHD</b> VNETIYNTTLKYGDVVGVTNTKYPYRVCSMAQ                                                                                                                                                                                                                                                           | 100 |
| (b) | gB-1  | 398 | KLQQIFNTSYNQTYEKYGNVS <b>V</b> FET <b>TGGLV</b> VFWQGI <b>KQKSL</b> VELERLANR <b>SS</b> LN <b>LTHN</b> RTRK <b>ST</b> DG <b>NN</b> AT <b>HL</b> SNMESVHN <b>L</b> VYAQLQFTYD <b>TL</b> RGYINRA                                                                                                                                                                                                                              | 498 |
|     | gB-2  | 398 | KLQQIFNTSYNQTYEKYGNVS <b>V</b> FET <b>SGGLV</b> VFWQGI <b>KQKSL</b> VELERLANR <b>SS</b> LN <b>LITH</b> -RTR <b>ST</b> SD <b>NN</b> THLS <b>SM</b> ESVHN <b>L</b> VYAQLQFTYD <b>TL</b> RGYINRA                                                                                                                                                                                                                               | 497 |
|     | gB-3  | 398 | KLQQIFN <b>AS</b> YNQTYEKYGNVS <b>V</b> FET <b>TGGLV</b> VFWQGI <b>KQKSL</b> LELERLAN <b>SS</b> GV <b>NSTR</b> -RTRK <b>ST</b> GN-T <b>TL</b> SP <b>ES</b> SVR <b>N</b> VYAQLQFTYD <b>TL</b> RSYINRA                                                                                                                                                                                                                        | 496 |
|     | gB-4  | 396 | KLQQIFN <b>AS</b> YNQTYEKYGNVS <b>V</b> FET <b>TGGLV</b> VFWQGI <b>KQKSL</b> VELERLANR <b>SS</b> LN <b>LTHS</b> TRR <b>ST</b> DG <b>TN</b> THLS <b>NMD</b> SVHN <b>L</b> VYAQLQFTYD <b>TL</b> RGYINRA                                                                                                                                                                                                                       | 496 |
|     | gB-5  | 400 | KLQQIFN <b>AS</b> YNQTYEKYGNVS <b>V</b> FET <b>TGGLV</b> VFWQGI <b>KQKSL</b> LELERLAN <b>SS</b> GV <b>NATR</b> -R <b>SK</b> R <b>ST</b> N <b>NT</b> TL <b>SL</b> -ENDSVRS <b>V</b> YAQLQFTYD <b>TL</b> RNYINRA                                                                                                                                                                                                              | 498 |
| (c) | gN-1  | 1   | MEWNTLVGLLVLSVA <b>ESS</b> GN <b>NS</b> ST <b>ST</b> SAT <b>T</b> - <b>SK</b> SS <b>AS</b> SV <b>ST</b> KL <b>TT</b> VAT <b>TS</b> AT <b>TT</b> TTTT <b>LT</b> ST <b>TK</b> LS <b>ST</b> THDPNV <b>MRR</b> HAN <b>DD</b> FYKA <b>HCT</b> SHMYELSL                                                                                                                                                                           | 99  |
|     | gN-2  | 1   | MECKTLVLGLL <b>LI</b> SA <b>VT</b> GSS <b>SS</b> NS <b>ST</b> ST <b>S</b> ST-- <b>TP</b> SP <b>SV</b> ST <b>SK</b> PT <b>TS</b> VT <b>TT</b> ST <b>TT</b> TTTT <b>TT</b> ST <b>ST</b> RL <b>SS</b> THDPNV <b>MRR</b> HAN <b>DD</b> FYKA <b>HCT</b> SHMYELSL                                                                                                                                                                 | 98  |
|     | gN-3a | 1   | MEWKT <b>VIL</b> GLFVLSVA <b>AG</b> SSGN <b>SS</b> ST <b>ST</b> SAT <b>LK</b> SS <b>SV</b> ST <b>SK</b> L <b>TT</b> AT <b>TT</b> TTTT <b>TT</b> - <b>MS</b> T <b>RS</b> ST <b>TD</b> NP <b>VM</b> KR <b>TH</b> DDFYKA <b>HCT</b> SHMYELSL                                                                                                                                                                                   | 99  |
|     | gN-3b | 1   | MEWKT <b>RV</b> LSFVLSVA <b>AG</b> SYGN <b>SS</b> ST <b>ST</b> SAT <b>TP</b> SP <b>SV</b> ST <b>SV</b> KT <b>ST</b> SV <b>TT</b> ST <b>PT</b> -TTTT <b>LT</b> ST <b>TK</b> PG <b>ST</b> THNP <b>VM</b> KR <b>HD</b> DDFYNA <b>HCT</b> SHMYELSL                                                                                                                                                                              | 99  |
|     | gN-4a | 1   | MEWNTLVGLLVLSVA <b>ASS</b> -- <b>NNT</b> ST <b>V</b> ST <b>P</b> SP-- <b>SS</b> TR <b>LT</b> TVKAT <b>T</b> AT <b>TT</b> ST <b>TT</b> TR <b>ST</b> ST <b>ST</b> TK <b>LS</b> ST <b>TH</b> DPNV <b>MRR</b> HAN <b>DD</b> FYKA <b>HCT</b> SHMYELSL                                                                                                                                                                            | 97  |
| (d) | gN-4b | 1   | MEWNTLVGLLVLSVA <b>ASS</b> -- <b>NHT</b> ST <b>A</b> ST <b>P</b> SP-- <b>SS</b> ST <b>HT</b> ST <b>TV</b> KAT <b>T</b> AT <b>TT</b> ST <b>TT</b> VT <b>ST</b> ST <b>ST</b> TK <b>PG</b> ST <b>TH</b> DPNV <b>MR</b> PHAN <b>DD</b> FYKA <b>HCT</b> SHMYELSL                                                                                                                                                                 | 97  |
|     | gN-4c | 1   | MEWNTLVGLLVLSVA <b>ASS</b> -- <b>NNT</b> ST <b>A</b> ST <b>P</b> SP-- <b>SS</b> ST <b>RT</b> ST <b>TV</b> KSTAVAT <b>TT</b> ST <b>TA</b> - <b>T</b> ST <b>ST</b> ST <b>SA</b> KPG <b>ST</b> THDPNV <b>MR</b> PHAN <b>DD</b> FYNA <b>HCT</b> SHMYELSL                                                                                                                                                                        | 96  |
| (e) | gO-1a | 1   | MGRKEM-MVRD <b>V</b> PK <b>MF</b> LIS <b>IS</b> FL <b>LV</b> SF <b>IN</b> CK <b>V</b> MSKA-LYN <b>R</b> W <b>R</b> GL <b>V</b> LS <b>K</b> IG <b>KY</b> KL <b>D</b> QL <b>K</b> LE <b>IL</b> Q <b>LE</b> T-T-- <b>I</b> ST <b>KY</b> - <b>NV</b> - <b>S</b> K <b>P</b> V <b>K</b> N <b>L</b> T <b>M</b> N <b>M</b> TE <b>FF</b> Q <b>Y</b> ILAG <b>P</b> IQ <b>N</b>                                                        | 103 |
|     | gO-1b | 1   | MGRKGE-M-RGV <b>F</b> N <b>L</b> FL <b>ML</b> LT <b>FL</b> LS <b>F</b> IN <b>C</b> RA <b>AV</b> RL-SV <b>G</b> RY <b>W</b> SG <b>V</b> LS <b>T</b> IG <b>K</b> Q <b>RL</b> DK <b>F</b> KE <b>IL</b> K <b>Q</b> LE <b>K</b> -D-- <b>I</b> Y <b>T</b> K <b>Y</b> F <b>N</b> M-T <b>R</b> Q <b>H</b> I <b>K</b> N <b>L</b> T <b>M</b> N <b>M</b> TE <b>FF</b> Q <b>Y</b> ILAG <b>P</b> IQ <b>N</b>                             | 103 |
|     | gO-1c | 1   | MGRKGD-M-RS <b>I</b> SK <b>L</b> F <b>FI</b> IS <b>L</b> T <b>V</b> LL <b>FS</b> I <b>IN</b> CK <b>V</b> VR-- <b>PP</b> G <b>RY</b> W <b>L</b> G <b>V</b> LS <b>T</b> IG <b>K</b> Q <b>LD</b> KE <b>F</b> KE <b>IL</b> K <b>Q</b> LE <b>R</b> -E-- <b>P</b> Y <b>T</b> K <b>Y</b> F <b>N</b> M-T <b>R</b> Q <b>H</b> V <b>K</b> N <b>L</b> T <b>M</b> N <b>M</b> T <b>Q</b> FF <b>Q</b> Y <b>IL</b> AG <b>P</b> IR <b>N</b> | 101 |
|     | gO-2a | 1   | MGRKGE--MRG <b>V</b> N <b>L</b> - <b>L</b> FL <b>I</b> W <b>L</b> T <b>FL</b> LF <b>FF</b> IN <b>CK</b> SARS <b>Q</b> -- <b>RA</b> - <b>P</b> FR <b>P</b> RI <b>W</b> HT <b>V</b> L <b>K</b> KL <b>Q</b> KL <b>LE</b> IL <b>Q</b> LE <b>P</b> -I-- <b>P</b> Y <b>I</b> K <b>Y</b> P <b>Q</b> I-N <b>T</b> RV <b>Q</b> SL <b>T</b> V <b>N</b> MTE <b>FF</b> Q <b>Y</b> ILAG <b>P</b> IR <b>N</b>                             | 100 |
|     | gO-2b | 1   | MGKKKI-LVR <b>G</b> V <b>P</b> R- <b>I</b> FM <b>V</b> - <b>S</b> T <b>FL</b> LI <b>FL</b> IN <b>CK</b> GAL <b>N</b> - <b>P</b> RG <b>P</b> W <b>I</b> G <b>V</b> PS <b>L</b> K <b>W</b> KL <b>KE</b> Q <b>Q</b> L <b>K</b> IE <b>IL</b> K <b>Q</b> LS <b>Q</b> -D-- <b>I</b> Y <b>T</b> K <b>Y</b> P <b>Q</b> I-T <b>K</b> N <b>Y</b> T <b>Q</b> IT <b>EL</b> K <b>K</b> F <b>FL</b> Y <b>IL</b> AG <b>P</b> IR <b>N</b>   | 102 |
| (f) | gO-3  | 1   | MGRKGE-M-RGV <b>F</b> N <b>L</b> FL <b>LI</b> SL <b>T</b> FL <b>FL</b> SL <b>LN</b> CK <b>SA</b> RV-FRL <b>FP</b> PY <b>GR</b> VL <b>SK</b> NG <b>RL</b> AE <b>IK</b> W <b>Q</b> EL <b>L</b> K <b>Q</b> IGAS <b>Q</b> -- <b>D</b> Y <b>K</b> FT <b>TI</b> - <b>P</b> T <b>K</b> Q <b>GL</b> NA <b>V</b> T <b>ME</b> R <b>FF</b> DN <b>Y</b> ILAG <b>P</b> IQ <b>N</b>                                                       | 104 |
|     | gO-4  | 1   | MGRKGE-M-RGV <b>F</b> N <b>L</b> FL <b>ML</b> SL <b>T</b> FL <b>FL</b> S <b>F</b> IN <b>CK</b> IT <b>VA</b> -- <b>R</b> ----- <b>F</b> R <b>V</b> KS <b>Q</b> KA <b>KE</b> ER <b>Q</b> L <b>K</b> L <b>IL</b> Q <b>EL</b> AS-K <b>T</b> G <b>D</b> Y <b>Y</b> FF <b>TF</b> PS <b>Q</b> Q <b>K</b> LY <b>IT</b> V <b>EM</b> K <b>Q</b> FP <b>PS</b> ILAG <b>P</b> IR <b>N</b>                                                | 99  |
|     | gO-5  | 1   | MGKKEMIM <b>V</b> K <b>G</b> I <b>P</b> K <b>IM</b> L <b>L</b> IS <b>IT</b> FL <b>LL</b> SL <b>IN</b> CV <b>LV</b> NS <b>R</b> GT <b>RS</b> W <b>PY</b> T <b>V</b> LS <b>Y</b> R <b>G</b> KE <b>IL</b> KK <b>Q</b> ED <b>IL</b> K <b>RL</b> MS-TSSD <b>G</b> Y <b>R</b> FL <b>MY</b> PS <b>Q</b> Q <b>K</b> FA <b>IV</b> IS <b>MD</b> K <b>FF</b> Q <b>Y</b> ILAG <b>P</b> IR <b>N</b>                                      | 109 |
| (g) | gO-1a | 267 | KEQFEKKAKKT <b>Q</b> ST <b>TT</b> PY <b>FS</b> YT <b>TS</b> AAL <b>N</b> VT <b>T</b> NV <b>YS</b> IT <b>TA</b> ARR <b>V</b> ST <b>ST</b> IA <b>YR</b> PD <b>SS</b> FM <b>K</b> S <b>I</b> MA                                                                                                                                                                                                                                | 323 |
|     | gO-1b | 267 | KEQSEKKSKKS <b>Q</b> ST <b>TT</b> PY <b>PS</b> YT <b>TT</b> STAL <b>N</b> VT <b>T</b> NAT <b>YS</b> VT <b>TT</b> ARR <b>V</b> ST <b>ST</b> IA <b>YR</b> PD <b>SS</b> FM <b>K</b> S <b>I</b> MT                                                                                                                                                                                                                              | 323 |
|     | gO-1c | 265 | KEQLEKKTKKS <b>Q</b> ST <b>TT</b> PY <b>FS</b> YT <b>TT</b> STAL <b>N</b> VT <b>T</b> NAT <b>Y</b> KV <b>TT</b> SA <b>KR</b> IP <b>T</b> ST <b>IA</b> YR <b>PD</b> SS <b>FM</b> K <b>S</b> IMA                                                                                                                                                                                                                              | 321 |
|     | gO-2a | 264 | KEQLEKKTKKS <b>Q</b> ST <b>TT</b> PY <b>LS</b> YT <b>TT</b> STAL <b>N</b> VT <b>T</b> NV <b>YS</b> VT <b>TT</b> AK <b>RV</b> PT <b>ST</b> IA <b>YR</b> PD <b>SS</b> FM <b>K</b> S <b>I</b> MA                                                                                                                                                                                                                               | 320 |
|     | gO-2b | 266 | KEQFEKKIKKS <b>Q</b> ST <b>TT</b> PY <b>FS</b> YT <b>TT</b> STAL <b>N</b> VT <b>T</b> NV <b>YS</b> VT <b>TT</b> ARR <b>V</b> PT <b>ST</b> IA <b>YR</b> PD <b>SS</b> FM <b>K</b> S <b>I</b> MA                                                                                                                                                                                                                               | 322 |
| (h) | gO-3  | 268 | KEP-QKKSKKS <b>Q</b> ST <b>TT</b> PS <b>F</b> -Y <b>TT</b> FT <b>FN</b> V-TNV <b>YS</b> AT <b>TT</b> ARR <b>T</b> PT <b>ST</b> IA <b>YR</b> PD <b>SS</b> FM <b>K</b> S <b>I</b> MT                                                                                                                                                                                                                                          | 321 |
|     | gO-4  | 263 | KSI-SK <b>KSR</b> --V <b>ST</b> TT <b>PT</b> SY <b>ST</b> -ST <b>IF</b> N <b>V</b> ST <b>NT</b> YS <b>PI</b> V- <b>P</b> TR <b>IP</b> T <b>ST</b> IG <b>YR</b> PD <b>EN</b> FM <b>K</b> S <b>ILT</b>                                                                                                                                                                                                                        | 314 |
|     | gO-5  | 273 | KEQPQ <b>K</b> N <b>K</b> G <b>S</b> QST <b>TT</b> PY <b>LS</b> YT <b>TT</b> STAF <b>N</b> VT <b>T</b> NV <b>YS</b> AT <b>AA</b> TR <b>V</b> AT <b>ST</b> GY <b>R</b> PD <b>SN</b> FM <b>K</b> S <b>I</b> MA                                                                                                                                                                                                                | 329 |
| (i) | gH-1  | 1   | MRPGLPPY <b>L</b> T <b>V</b> FT <b>V</b> Y <b>LL</b> SH <b>L</b> PS <b>Q</b> RY <b>G</b> AD <b>A</b> SE <b>AL</b> DP <b>H</b> AF <b>H</b> LL <b>N</b> TY <b>G</b> RP <b>IR</b> FL <b>RE</b> NT <b>T</b> Q <b>CT</b> YN <b>SS</b> LR <b>N</b> ST <b>V</b> V <b>RE</b> NA <b>IS</b> FN <b>FF</b> Q <b>S</b> YN <b>Q</b> Y <b>V</b>                                                                                            | 90  |
|     | gH-2  | 1   | MRPGLPSY <b>L</b> I <b>V</b> L <b>AV</b> CL <b>L</b> SH <b>LL</b> SS <b>RY</b> GA <b>E</b> AI <b>SE</b> PLD-KAF <b>H</b> LL <b>N</b> TY <b>G</b> RP <b>IR</b> FL <b>RE</b> NT <b>T</b> Q <b>CT</b> YN <b>SS</b> LR <b>N</b> ST <b>V</b> V <b>RE</b> NA <b>IS</b> FN <b>FF</b> Q <b>S</b> YN <b>Q</b> Y <b>V</b>                                                                                                             | 89  |

**Figure S1. Peptide sequence variations that define the genotypes of glycoproteins.** Peptide sequence alignments were constructed using T-coffee version 13.45.0.4846264 [32]. Sequence alignments are color-coded: red indicates a highly conserved residue, blue a weakly conserved residue, and black a non-conserved residue; dashes indicate insertions/deletions. **(a)** The most variable regions defining the five gB genotypes are codons 26-70 and codons 441-490. The GenBank accession numbers of published reference genotype sequences are: gB-1 (Towne strain, ACM48044.1), gB-2 (AD169 strain, DAA00160.1), gB-3 (Toledo strain, ADD39116.1), gB-4 (C194 strain, AAA45925), and gB-5 (saliva isolate, AZB53144). **(b)** The most variable regions defining the four gN genotypes and their subtypes are codons 1-87. The GenBank accession numbers of published reference genotype sequences are: gN-1 (AD169 strain, P16795.1), gN-2 (Can 2 strain, AAL77763.1), gN-3a (PS strain, AAL77773.1), gN-3b (A8-27F strain, AAO24841.1), gN-4a (ZV strain, AAL77779.1), gN-4b (Towne strain, AGT36491.1), and gN-4c (Toledo strain, AAS48964.1). **(c)** The most variable regions defining the five gO genotypes and their subtypes are codons 1-98 and codons 270-313. The GenBank accession numbers of published reference genotype sequences are: gO-1a (AD169 strain, ACL51143.1), gO-1b (Cincy 2 strain, ACS93309.1), gO-1c (Toledo strain, AAS48965.1), gO-2a (FUK19U strain, ABY48952.1), gO-2b (SW1102 strain, AAN40063.1), gO-3 (SW5 strain, AAN40074.1), gO-4 (Towne strain, AGT36493.1), and gO-5 (Merlin strain, YP\_081522.1). **(d)** The most variable regions defining the two gH genotypes are codons 1-37. The GenBank accession numbers of published reference genotype sequences are: gH-1 (AD169 strain, ACL51144.1) and gH-2 (Towne strain, AGT36494.1).
